# Supplementary material for: Prevalence and risk factors associated with Leishmania infection in Trang Province, southern Thailand
Source: PLoS Negl Trop Dis. 2017 Nov 20;11(11):e0006095. doi: 10.1371/journal.pntd.0006095 (PMC5714378; doi:10.1371/journal.pntd.0006095)
Supplement: S1 Checklist — (DOCX) [file pntd.0006095.s001.docx]

**Supporting information**

**STROBE Statement—Checklist of items that should be included in reports of** ***cross-sectional studies***

|  | Item No | Recommendation |
| --- | --- | --- |
| **Title and abstract** | 1 | (*a*) Indicate the study’s design with a commonly used term in the title or the abstract  (Abstract, paragraph 2) |
| (*b*) Provide in the abstract an informative and balanced summary of what was done and what was found (Abstract, paragraph 1,4) |
| Introduction | | |
| Background/rationale | 2 | Explain the scientific background and rationale for the investigation being reported (Introduction, paragraph 1,2) |
| Objectives | 3 | State specific objectives, including any prespecified hypotheses (Introduction, paragraph 3) |
| Methods | | |
| Study design | 4 | Present key elements of study design early in the paper (Methods, paragraph 1) |
| Setting | 5 | Describe the setting, locations, and relevant dates, including periods of recruitment, exposure, follow-up, and data collection (Methods, paragraph 1) |
| Participants | 6 | (*a*) Give the eligibility criteria, and the sources and methods of selection of participants (Methods, paragraph 1) |
| Variables | 7 | Clearly define all outcomes, exposures, predictors, potential confounders, and effect modifiers. Give diagnostic criteria, if applicable (Methods: definition, paragraph 1-3) |
| Data sources/ measurement | 8* | For each variable of interest, give sources of data and details of methods of assessment (measurement). Describe comparability of assessment methods if there is more than one group (Methods: paragraph 7-10) |
| Bias | 9 | Describe any efforts to address potential sources of bias (Methods: paragraph 7-11) |
| Study size | 10 | Explain how the study size was arrived at (N/A) |
| Quantitative variables | 11 | Explain how quantitative variables were handled in the analyses. If applicable, describe which groupings were chosen and why (N/A) |
| Statistical methods | 12 | (*a*) Describe all statistical methods, including those used to control for confounding (Methods: paragraph 11) |
| (*b*) Describe any methods used to examine subgroups and interactions (N/A) |
| (*c*) Explain how missing data were addressed (N/A) |
| (*d*) If applicable, describe analytical methods taking account of sampling strategy (N/A) |
| (*e*) Describe any sensitivity analyses (N/A) |
| Results | | |
| Participants | 13* | (a) Report numbers of individuals at each stage of study—eg numbers potentially eligible, examined for eligibility, confirmed eligible, included in the study, completing follow-up, and analysed (Results, paragraph 1) |
| (b) Give reasons for non-participation at each stage (N/A) |
| (c) Consider use of a flow diagram (N/A) |
| Descriptive data | 14* | (a) Give characteristics of study participants (eg demographic, clinical, social) and information on exposures and potential confounders (Results, paragraph 1) |
| (b) Indicate number of participants with missing data for each variable of interest (Results, table 1) |
| Outcome data | 15* | Report numbers of outcome events or summary measures (Results, paragraph 2,4) |
| Main results | 16 | (*a*) Give unadjusted estimates and, if applicable, confounder-adjusted estimates and their precision (eg, 95% confidence interval). Make clear which confounders were adjusted for and why they were included (Results, paragraph 3,6) |
| (*b*) Report category boundaries when continuous variables were categorized (N/A) |
| (*c*) If relevant, consider translating estimates of relative risk into absolute risk for a meaningful time period (N/A) |
| Other analyses | 17 | Report other analyses done—eg analyses of subgroups and interactions, and sensitivity analyses (Results, paragraph 5,7) |
| Discussion | | |
| Key results | 18 | Summarise key results with reference to study objectives (Discussion, paragraph 1-4, 6-9) |
| Limitations | 19 | Discuss limitations of the study, taking into account sources of potential bias or imprecision. Discuss both direction and magnitude of any potential bias (Discussion, paragraph 5) |
| Interpretation | 20 | Give a cautious overall interpretation of results considering objectives, limitations, multiplicity of analyses, results from similar studies, and other relevant evidence (Discussion, paragraph 5) |
| Generalisability | 21 | Discuss the generalisability (external validity) of the study results (Discussion, paragraph 5) |
| Other information | | |
| Funding | 22 | Give the source of funding and the role of the funders for the present study and, if applicable, for the original study on which the present article is based (N/A in the manuscript but addressed in the online journal submission system as the requirement of the journal) |
